# Supplementary material for: Controlled Release of Bone Morphogenetic Protein-2 Augments the Coupling of Angiogenesis and Osteogenesis for Accelerating Mandibular Defect Repair
Source: MDPI journal article supplement (doi:10.3390/pharmaceutics14112397), 2022-11-07
Supplement: s1 [file s1]

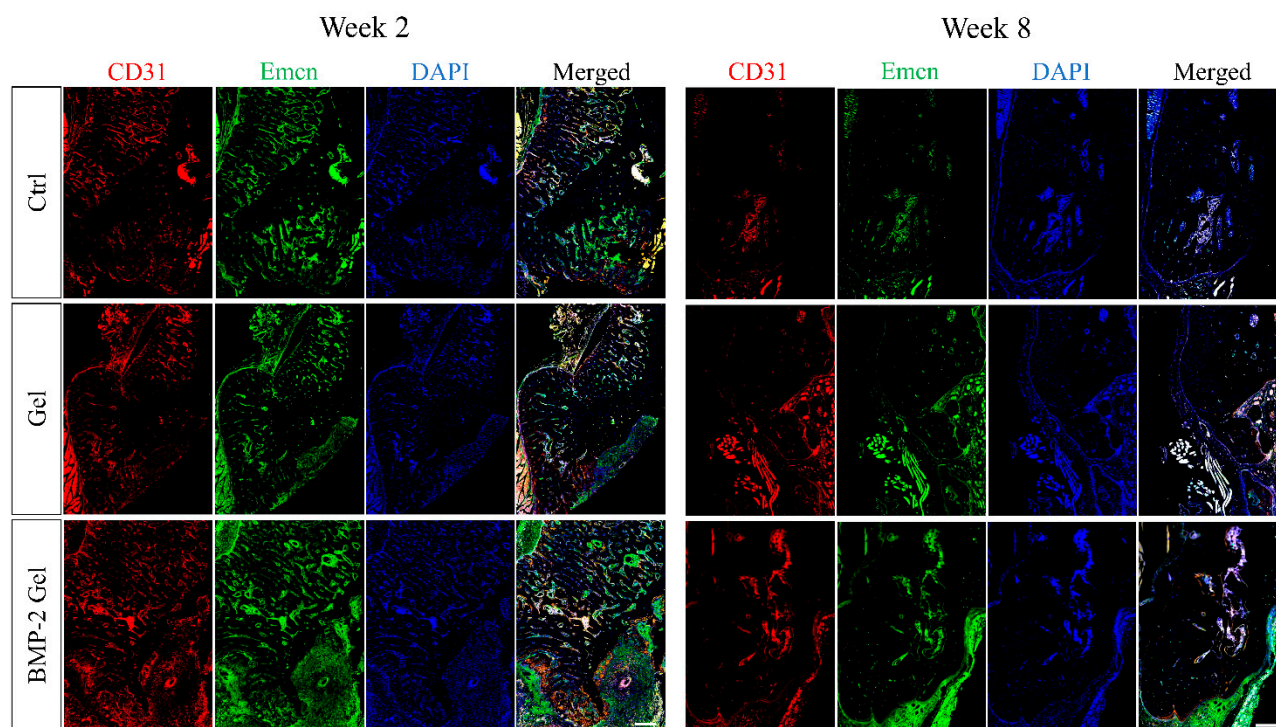

**Supplementary Figure S1** Immunofluorescent staining of type H vessels (CD31+ Emcn+) in the mandibular bone. Scale bar, 250  $\mu$ m.

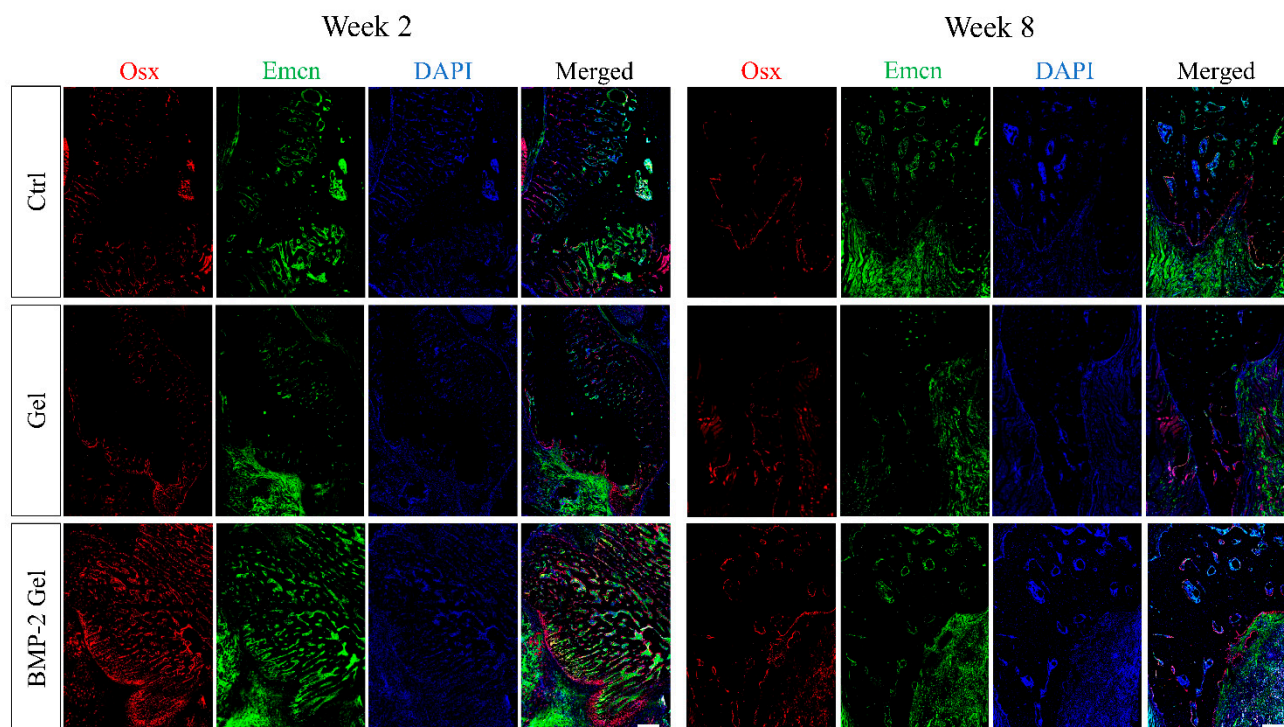

**Supplementary Figure S2** Immunofluorescent staining of Osx+ osteoprogenitor cells and Emcn+ vessels in the mandibular bone. Scale bar, 250  $\mu$ m.

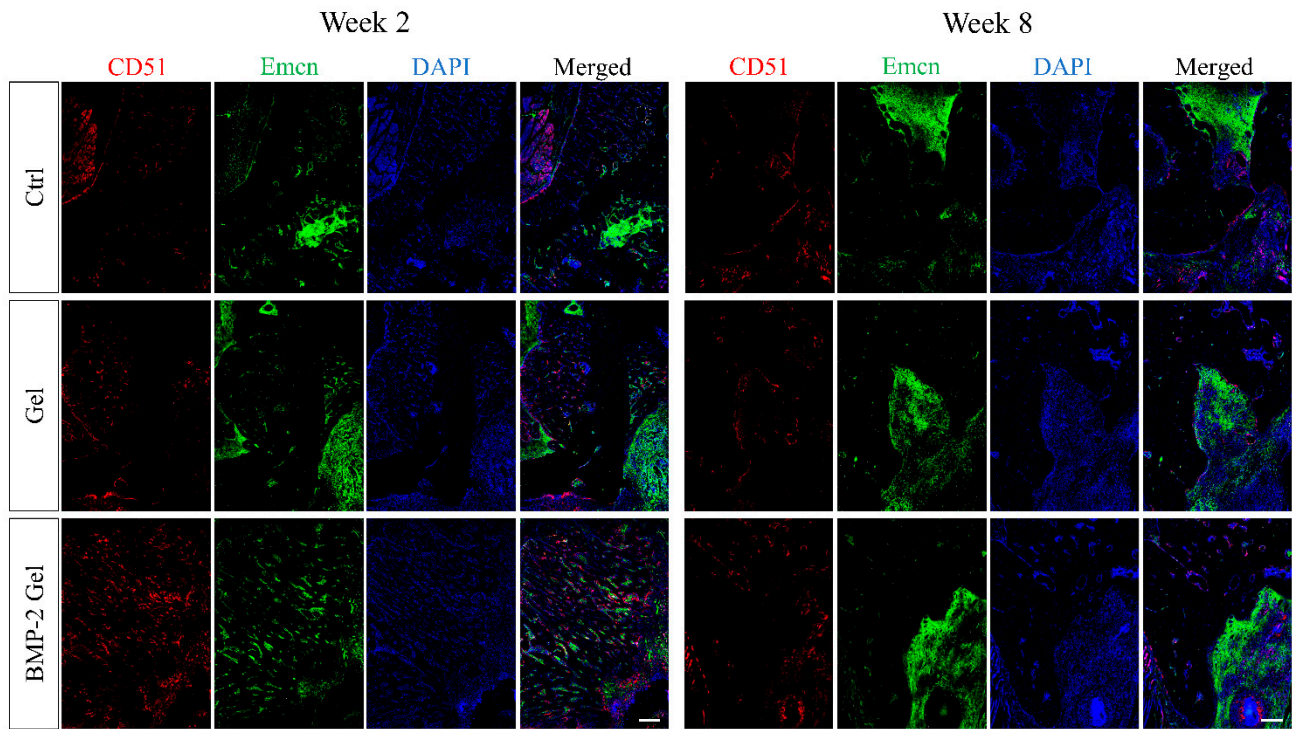

**Supplementary Figure S3** Immunofluorescent staining of CD51+ cells and Emcn+ vessels in the mandibular bone. Scale bar, 250  $\mu$ m.

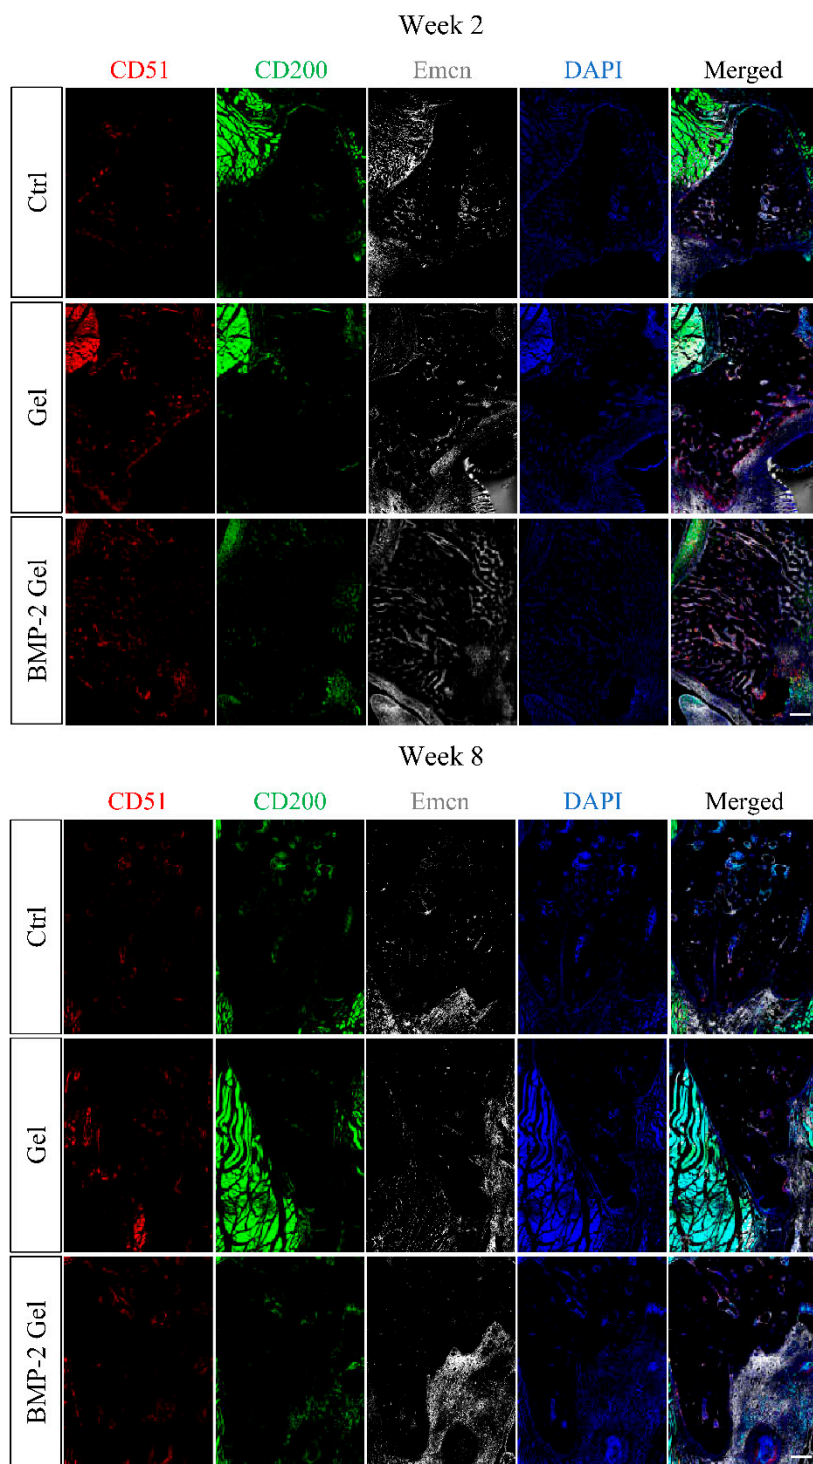

**Supplementary Figure S4** Immunofluorescent staining of CD51+ CD200+ SSCs and Emcn+ vessels in the new bone. Scale bar, 250  $\mu$ m.



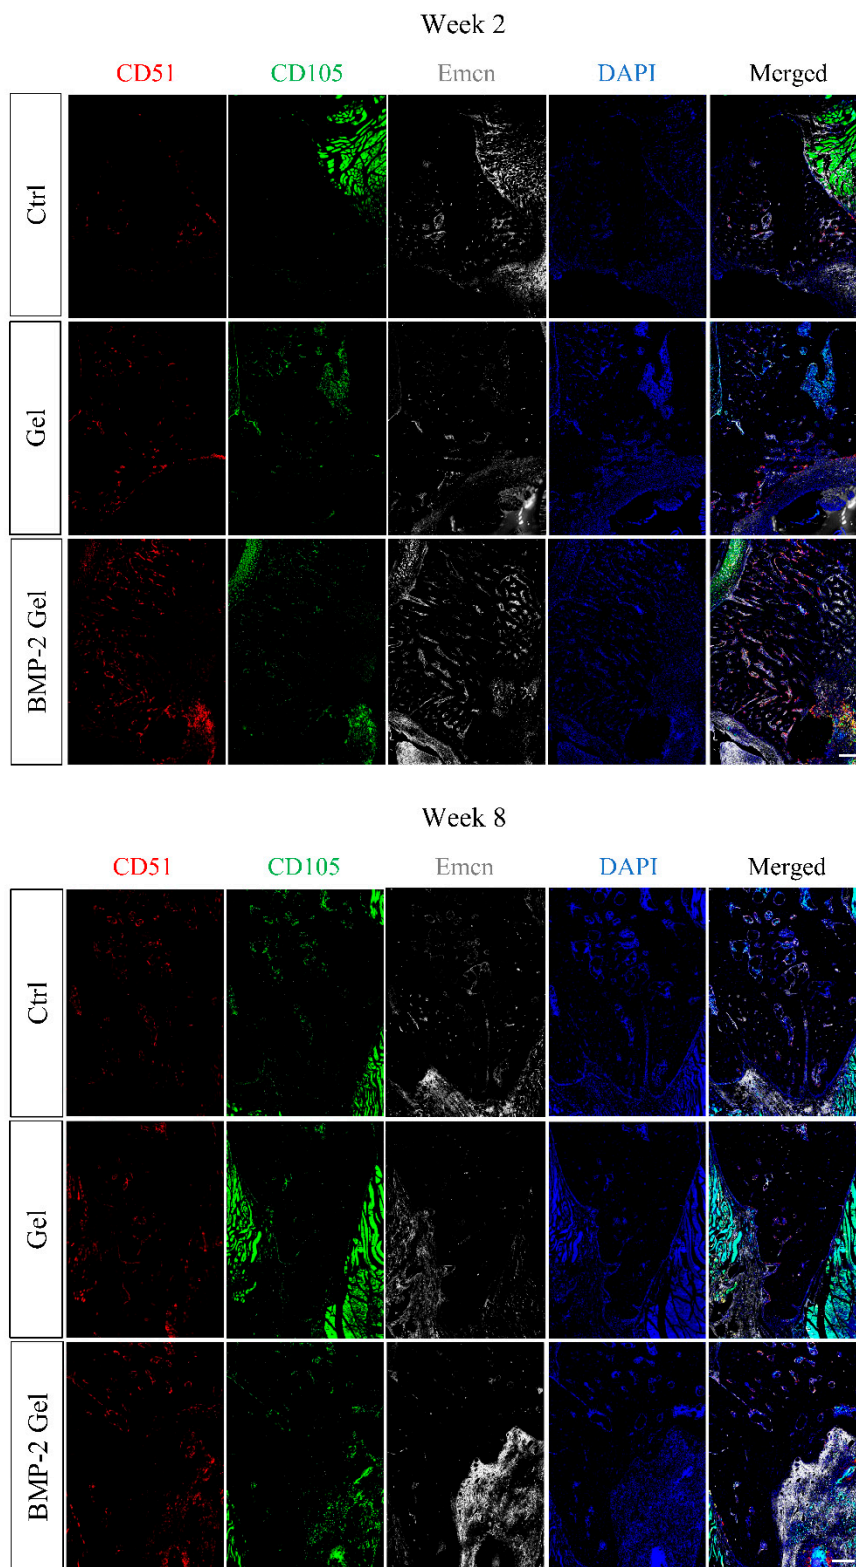

**Supplementary Figure S5** Immunofluorescent staining of CD51+ CD105+ SSCs and Emcn+ vessels in the new bone. Scale bar, 250  $\mu$ m.

**Supplementary Table S1** Information of antibodies used in this study

| <b>Antibodies</b>           |                         |       |
|-----------------------------|-------------------------|-------|
| CD31                        | R&D system, af3628      | 1:150 |
| Endomucin (Emcn)            | Santa Cruz, sc65495     | 1:150 |
| CD51                        | ThermoFisher, MA5-32195 | 1:200 |
| CD200                       | Abcam, ab34087          | 1:100 |
| CD105                       | Abcam, ab252345         | 1:200 |
| Osterix (Osx)               | Abcam, ab22552          | 1:200 |
| Anti-goat Alexa Fluor 546   | ThermoFisher, A11056    | 1:400 |
| Anti-rat Alexa Fluor 488    | ThermoFisher, A21208    | 1:400 |
| Anti-rabbit Alexa Fluor 647 | Abcam, ab150155         | 1:400 |
